# Supplementary material for: The Bittersweet Symphony of COVID-19: Associations between TAS1Rs and TAS2R38 Genetic Variations and COVID-19 Symptoms
Source: MDPI journal article supplement (doi:10.3390/life14020219), 2024-02-03
Supplement: s1 [file s1]

**Table S3. Associations between TAS2R38 haplotype and COVID-19 symptoms.** Presence of COVID-19-related symptoms was registered as a dichotomous variable (1:“yes”/0: no”). All models are adjusted for sex and age. OR: Odds Ratio. 95% CI: 95% Confidence Interval.

| COVID-19 symptoms   | OR (95% CI) - AVI/PAV | OR (95% CI) - PAV/PAV | <i>p</i> -value |
|---------------------|-----------------------|-----------------------|-----------------|
| Smell taste         | 0.78 (0.27 - 2.06)    | 1.17 (0.32 - 4.32)    | 0.70            |
| Dry cough           | 0.77 (0.36 - 1.61)    | 1.15 (0.46 - 2.90)    | 0.53            |
| Coughing up mucus   | 1.19 (0.51 - 2.99)    | 1.96 (0.71 - 5.62)    | 0.38            |
| Hearing loss        | 0.97 (0.40 - 2.38)    | 1.39 (0.49 - 4.02)    | 0.70            |
| Blocked nose        | 0.83 (0.39 - 1.75)    | 0.80 (0.32 - 2.00)    | 0.87            |
| Rhinorrhea          | 1.16 (0.50 - 2.71)    | 1.31 (0.47 - 3.71)    | 0.87            |
| Sneezing            | 1.15 (0.50 - 2.64)    | 1.25 (0.45 - 3.48)    | 0.91            |
| Lacrimation         | 0.91 (0.39 - 2.21)    | 1.57 (0.56 - 4.47)    | 0.45            |
| Raucousness         | 1.23 (0.50 - 3.21)    | 1.52 (0.51 - 4.61)    | 0.76            |
| Fever               | 0.94 (0.43 - 2.03)    | 1.33 (0.50 - 3.64)    | 0.72            |
| Swelling            | 0.88 (0.38 - 2.09)    | 0.84 (0.29 - 2.36)    | 0.94            |
| Chills              | 0.94 (0.40 - 2.17)    | 0.97 (0.35 - 2.71)    | 0.99            |
| Headache            | 1.56 (0.72 - 3.39)    | 1.44 (0.56 - 3.74)    | 0.52            |
| Sore throat         | 0.83 (0.39 - 1.77)    | 0.98 (0.39 - 2.46)    | 0.86            |
| Muscle pain         | 1.43 (0.65 - 3.10)    | 1.51 (0.58 - 4.03)    | 0.62            |
| Joint pain          | 1.50 (0.69 - 3.21)    | 1.44 (0.56 - 3.76)    | 0.58            |
| Chest pain          | 0.96 (0.45 - 2.09)    | 1.11 (0.44 - 2.83)    | 0.93            |
| Sinonasal pain      | 1.51 (0.66 - 3.76)    | 1.90 (0.69 - 5.42)    | 0.45            |
| Neck tumefaction    | 1.20 (0.37 - 4.70)    | 2.36 (0.61 - 10.24)   | 0.38            |
| Loss of appetite    | 0.46 (0.21 - 0.98)    | 0.55 (0.22 - 1.38)    | 0.13            |
| Problems breathing  | 0.92 (0.44 - 1.97)    | 0.55 (0.20 - 1.43)    | 0.39            |
| Shortness of breath | 0.88 (0.41 - 1.83)    | 0.51 (0.20 - 1.28)    | 0.30            |
