# Supplementary material for: The Bittersweet Symphony of COVID-19: Associations between TAS1Rs and TAS2R38 Genetic Variations and COVID-19 Symptoms
Source: MDPI journal article supplement (doi:10.3390/life14020219), 2024-02-03
Supplement: s1 [file s1]

**Table S4. Associations between TAS2R38 haplotype and COVID-19 symptoms severity.** COVID-19-related symptoms severity was ranked on a 0–2-point scale, as none (0), mild (1), severe (2). All models are adjusted for sex and age. OR: Odds Ratio. 95% CI: 95% Confidence Interval.

| <b>ARTIQ symptoms severity</b> | <b>OR AVI/PAV (95% CI)</b> | <b>OR PAV/PAV (95% CI)</b> | <b><i>p</i>-value</b> |
|--------------------------------|----------------------------|----------------------------|-----------------------|
| Smell taste                    | 0.86 (0.37 - 1.89)         | 1.65 (0.58 - 4.97)         | 0.3312                |
| Dry cough                      | 0.94 (0.47 - 1.87)         | 1.11 (0.49 - 2.52)         | 0.8954                |
| Coughing up mucus              | 1.16 (0.50 - 2.91)         | 1.70 (0.63 - 4.79)         | 0.5393                |
| Hearing loss                   | 0.97 (0.41 - 2.36)         | 1.14 (0.41 - 3.18)         | 0.9303                |
| Blocked nose                   | 0.70 (0.35 - 1.41)         | 0.59 (0.25 - 1.38)         | 0.4571                |
| Rhinorrhea                     | 1.04 (0.47 - 2.30)         | 1.28 (0.49 - 3.41)         | 0.8436                |
| Sneezing                       | 1.20 (0.55 - 2.67)         | 1.14 (0.44 - 2.94)         | 0.9029                |
| Lacrimation                    | 0.96 (0.41 - 2.30)         | 1.40 (0.52 - 3.84)         | 0.6508                |
| Raucousness                    | 1.15 (0.47 - 2.99)         | 1.32 (0.45 - 3.97)         | 0.8798                |
| Fever                          | 0.63 (0.31 - 1.27)         | 0.98 (0.41 - 2.32)         | 0.2694                |
| Swelling                       | 0.92 (0.41 - 2.12)         | 0.76 (0.28 - 2.06)         | 0.8561                |
| Chills                         | 0.83 (0.37 - 1.84)         | 0.68 (0.26 - 1.77)         | 0.7304                |
| Headache                       | 1.34 (0.67 - 2.70)         | 1.49 (0.63 - 3.52)         | 0.6203                |
| Sore throat                    | 1.06 (0.53 - 2.16)         | 1.19 (0.49 - 2.82)         | 0.9306                |
| Muscle pain                    | 1.12 (0.56 - 2.25)         | 1.08 (0.47 - 2.52)         | 0.9509                |
| Joint pain                     | 1.25 (0.62 - 2.49)         | 1.11 (0.48 - 2.56)         | 0.8175                |
| Chest pain                     | 1.00 (0.47 - 2.14)         | 0.98 (0.40 - 2.41)         | 0.9983                |
| Sinonasal pain                 | 1.40 (0.61 - 3.48)         | 1.62 (0.60 - 4.55)         | 0.6208                |
| Neck tumefaction               | 1.26 (0.38 - 4.89)         | 2.39 (0.62 - 10.29)        | 0.3909                |
| Loss of appetite               | 0.49 (0.24 - 0.99)         | 0.46 (0.19 - 1.07)         | 0.1027                |
| Breathing problems             | 0.94 (0.46 - 1.96)         | 0.50 (0.19 - 1.26)         | 0.2367                |
| Shortness of breath            | 0.93 (0.47 - 1.86)         | 0.50 (0.20 - 1.17)         | 0.1869                |
