# Supplementary material for: The Bittersweet Symphony of COVID-19: Associations between TAS1Rs and TAS2R38 Genetic Variations and COVID-19 Symptoms
Source: MDPI journal article supplement (doi:10.3390/life14020219), 2024-02-03
Supplement: s1 [file s1]

**Table S2. Associations between rs35874116 (*TAS1R2* gene), rs307355 (*TAS1R3* gene) and COVID-19 symptoms severity.** COVID-19-related symptoms severity was ranked on a 0–2-point scale. P-value columns report not adjusted *p*-values. Statistically significant models (Benjamini-Hochberg *adjusted p*-value<0.05) are in bold. OR: Odds Ratio. 95% CI: 95% Confidence Interval.

| COVID-19 symptoms severity | rs35874116 ( <i>TAS1R2</i> ) |                 | rs307355 ( <i>TAS1R3</i> ) |                 |
|----------------------------|------------------------------|-----------------|----------------------------|-----------------|
|                            | OR (95% CI)                  | <i>p</i> -value | OR (95%CI)                 | <i>p</i> -value |
| Smell taste                | 0.96 (0.61 - 1.52)           | 0.8485          | 0.95 (0.34 - 2.36)         | 0.9091          |
| Dry cough                  | 1.00 (0.68 - 1.47)           | 0.9966          | 1.15 (0.52 - 2.64)         | 0.7326          |
| Coughing up mucus          | 0.83 (0.50 - 1.35)           | 0.4571          | 2.22 (0.71 - 9.78)         | 0.1847          |
| Hearing loss               | 0.77 (0.46 - 1.27)           | 0.3096          | 1.53 (0.55 - 4.94)         | 0.4271          |
| Blocked nose               | 0.89 (0.59 - 1.33)           | 0.5657          | 1.92 (0.83 - 4.72)         | 0.1288          |
| Rhinorrhea                 | 1.16 (0.74 - 1.82)           | 0.5208          | 1.42 (0.56 - 3.82)         | 0.4664          |
| Sneezing                   | 1.09 (0.69 - 1.73)           | 0.7023          | 1.11 (0.41 - 3.11)         | 0.8351          |
| Lacrimation                | 1.12 (0.69 - 1.78)           | 0.6497          | 2.40 (0.81 - 8.85)         | 0.1168          |
| Raucousness                | 0.94 (0.57 - 1.54)           | 0.8169          | 1.55 (0.52 - 5.74)         | 0.4464          |
| Fever                      | 1.04 (0.70 - 1.53)           | 0.8483          | 0.80 (0.36 - 1.76)         | 0.5813          |
| Swelling                   | 1.38 (0.87 - 2.19)           | 0.1723          | 1.74 (0.63 - 5.65)         | 0.2984          |
| Chills                     | 1.21 (0.77 - 1.90)           | 0.4146          | 2.47 (0.87 - 8.09)         | 0.0902          |
| Headache                   | 0.90 (0.61 - 1.34)           | 0.6074          | 3.06 (1.28 - 7.95)         | 0.0114          |
| Sore throat                | 1.39 (0.91 - 2.13)           | 0.1228          | 1.20 (0.47 - 3.34)         | 0.7035          |
| Muscle pain                | 0.94 (0.63 - 1.40)           | 0.7548          | 1.42 (0.63 - 3.23)         | 0.3913          |
| Joint pain                 | 0.88 (0.58 - 1.31)           | 0.5176          | 2.26 (1.01 - 5.20)         | 0.0459          |
| <b>Chest pain</b>          | 1.38 (0.91 - 2.09)           | 0.1256          | <b>8.30 (2.32 - 53.13)</b> | <b>0.0004</b>   |
| Sinonasal pain             | 0.80 (0.49 - 1.30)           | 0.3772          | 1.86 (0.66 - 6.65)         | 0.257           |
| Neck tumefaction           | 1.21 (0.62 - 2.28)           | 0.5583          | 3.04 (0.57 - 56.41)        | 0.2236          |
| Loss of appetite           | 0.97 (0.63 - 1.47)           | 0.8763          | 1.30 (0.54 - 3.37)         | 0.5692          |
| Problems breathing         | 1.01 (0.66 - 1.54)           | 0.9624          | 3.02 (1.07 - 10.81)        | 0.0353          |
| <b>Shortness of breath</b> | 1.13 (0.76 - 1.69)           | 0.5437          | <b>4.83 (1.71 - 17.32)</b> | <b>0.0021</b>   |
