# Supplementary material for: The Bittersweet Symphony of COVID-19: Associations between TAS1Rs and TAS2R38 Genetic Variations and COVID-19 Symptoms
Source: MDPI journal article supplement (doi:10.3390/life14020219), 2024-02-03
Supplement: s1 [file s1]

**Table S5. Abbreviations and acronyms.** An alphabetic list of all the abbreviations and acronyms reported in the manuscript is listed in the left column; their full meaning is reported in the right column.

| <b>Abbreviations and acronyms</b>               | <b>Full meaning</b>                             |
|-------------------------------------------------|-------------------------------------------------|
| Acute phase                                     | AP                                              |
| Acute Respiratory Distress Syndrome             | ARDS                                            |
| Acute Respiratory Tract Infection Questionnaire | ARTIQ                                           |
| Acyl-Homoserine Lactones                        | AHLs                                            |
| Airway surface liquid                           | ASL                                             |
| Alanine-Valine-Isoleucine                       | AVI                                             |
| Antimicrobial peptides                          | AMPs                                            |
| Bitter taste receptors                          | TAS2Rs                                          |
| Chronic rhinosinusitis                          | CRS                                             |
| COVID-19                                        | Coronavirus disease 2019                        |
| G-protein-coupled receptors                     | GPCRs                                           |
| Nitric oxide                                    | NO                                              |
| Phenylthiocarbamide                             | PTC                                             |
| Polymerase chain reaction                       | PCR                                             |
| Proline-Alanine-Valine                          | PAV                                             |
| Propylthiouracil                                | PROP                                            |
| SARS-CoV-2                                      | Severe Acute Respiratory Syndrome Coronavirus 2 |
| Single Nucleotide Polymorphisms                 | SNPs                                            |
| Solitary chemosensory cells                     | SCCs                                            |
| Sweet taste receptors                           | TAS1Rs                                          |
| Taste-sensing type 2 receptor                   | TAS2R38                                         |
| Whole-Genome sequencing                         | WGS                                             |
