# Supplementary material for: The Bittersweet Symphony of COVID-19: Associations between TAS1Rs and TAS2R38 Genetic Variations and COVID-19 Symptoms
Source: MDPI journal article supplement (doi:10.3390/life14020219), 2024-02-03
Supplement: s1 [file s1]

**Table S1. Associations between rs35874116 (*TAS1R2* gene), rs307355 (*TAS1R3* gene) and COVID-19 symptoms.** Presence of COVID-19-related symptoms was registered as a dichotomous variable (1:“yes”/0:“no”). P-value columns report not adjusted *p*-values. Statistically significant models (Benjamini-Hochberg *adjusted p*-value<0.05) are in bold. OR: Odds Ratio. 95% CI: 95% Confidence Interval.

| COVID-19 symptoms          | rs35874116 ( <i>TAS1R2</i> ) |               |                 | rs307355 ( <i>TAS1R3</i> ) |                       |                 |
|----------------------------|------------------------------|---------------|-----------------|----------------------------|-----------------------|-----------------|
|                            | OR                           | 95% CI        | <i>p</i> -value | OR                         | 95% CI                | <i>p</i> -value |
| Smell taste                | 0.76                         | (0.45 - 1.33) | 0.3359          | 1.20                       | (0.37 - 3.33)         | 0.749           |
| Dry cough                  | 1.06                         | (0.69 - 1.62) | 0.7977          | 1.03                       | (0.42 - 2.48)         | 0.956           |
| Coughing up mucus          | 0.87                         | (0.52 - 1.42) | 0.5718          | 2.32                       | (0.74 - 10.25)        | 0.157           |
| Hearing loss               | 0.80                         | (0.48 - 1.31) | 0.3864          | 1.48                       | (0.52 - 4.85)         | 0.472           |
| Blocked nose               | 0.88                         | (0.57 - 1.34) | 0.5423          | 1.84                       | (0.76 - 4.67)         | 0.178           |
| Rhinorrhea                 | 1.12                         | (0.70 - 1.81) | 0.6349          | 1.37                       | (0.5 - 3.83)          | 0.540           |
| Sneezing                   | 1.03                         | (0.65 - 1.66) | 0.8901          | 1.44                       | (0.53 - 4)            | 0.474           |
| Lacrimation                | 1.08                         | (0.66 - 1.73) | 0.7616          | 2.47                       | (0.83 - 9.12)         | 0.107           |
| Raucousness                | 0.99                         | (0.59 - 1.64) | 0.9802          | 1.61                       | (0.54 - 5.94)         | 0.414           |
| Fever                      | 1.13                         | (0.72 - 1.79) | 0.6083          | 0.67                       | (0.23 - 1.73)         | 0.425           |
| Swelling                   | 1.46                         | (0.91 - 2.37) | 0.1202          | 1.88                       | (0.66 - 6.16)         | 0.242           |
| Chills                     | 1.17                         | (0.73 - 1.88) | 0.5175          | 2.97                       | (1.05 - 9.74)         | 0.040           |
| Headache                   | 1.06                         | (0.68 - 1.66) | 0.8037          | 3.00                       | (1.21 - 7.97)         | 0.018           |
| Sore throat                | 1.30                         | (0.84 - 2.02) | 0.2395          | 1.63                       | (0.65 - 4.49)         | 0.303           |
| Muscle pain                | 0.95                         | (0.61 - 1.51) | 0.8373          | 1.46                       | (0.57 - 3.56)         | 0.419           |
| Joint pain                 | 0.90                         | (0.57 - 1.41) | 0.6395          | 2.03                       | (0.83 - 4.96)         | 0.120           |
| <b>Chest pain</b>          | 1.46                         | (0.94 - 2.27) | 0.0889          | <b>8.11</b>                | <b>(2.26 - 51.99)</b> | <b>0.001</b>    |
| Sinonasal pain             | 0.80                         | (0.48 - 1.29) | 0.3623          | 1.80                       | (0.63 - 6.48)         | 0.288           |
| Neck tumefaction           | 1.18                         | (0.61 - 2.23) | 0.6121          | 3.22                       | (0.60 - 59.68)        | 0.198           |
| Loss of appetite           | 0.96                         | (0.62 - 1.48) | 0.8611          | 1.42                       | (0.58 - 3.73)         | 0.450           |
| Breathing problems         | 1.03                         | (0.66 - 1.6)  | 0.9006          | 3.12                       | (1.1 - 11.21)         | 0.031           |
| <b>Shortness of breath</b> | 1.19                         | (0.78 - 1.83) | 0.4241          | <b>5.45</b>                | <b>(1.94 - 19.48)</b> | <b>0.001</b>    |
