# Supplementary material for: The Bittersweet Symphony of COVID-19: Associations between TAS1Rs and TAS2R38 Genetic Variations and COVID-19 Symptoms
Source: Life (Basel). 2024 Feb 3;14(2):219. doi: 10.3390/life14020219 (PMC10890446; doi:10.3390/life14020219)
Supplement: Supplementary file 1 [file life-14-00219-s001.zip]

Archive with 5 entries (5 files):
- Table S1_sweet receptors_logistic models.pdf
- Table S2_sweet receptors_ordinal models.pdf
- Table S3_TAS2R38_logistic models.pdf
- Table S4_TAS2R38_ordinal models.pdf
- Table S5_Abbreviations and acronyms.pdf
